# Supplementary material for: Expression and Function of Toll Pathway Components in the Early Development of the Wasp Nasonia vitripennis
Source: MDPI journal article supplement (doi:10.3390/jdb10010007), 2022-01-26
Supplement: s1 [file s1]

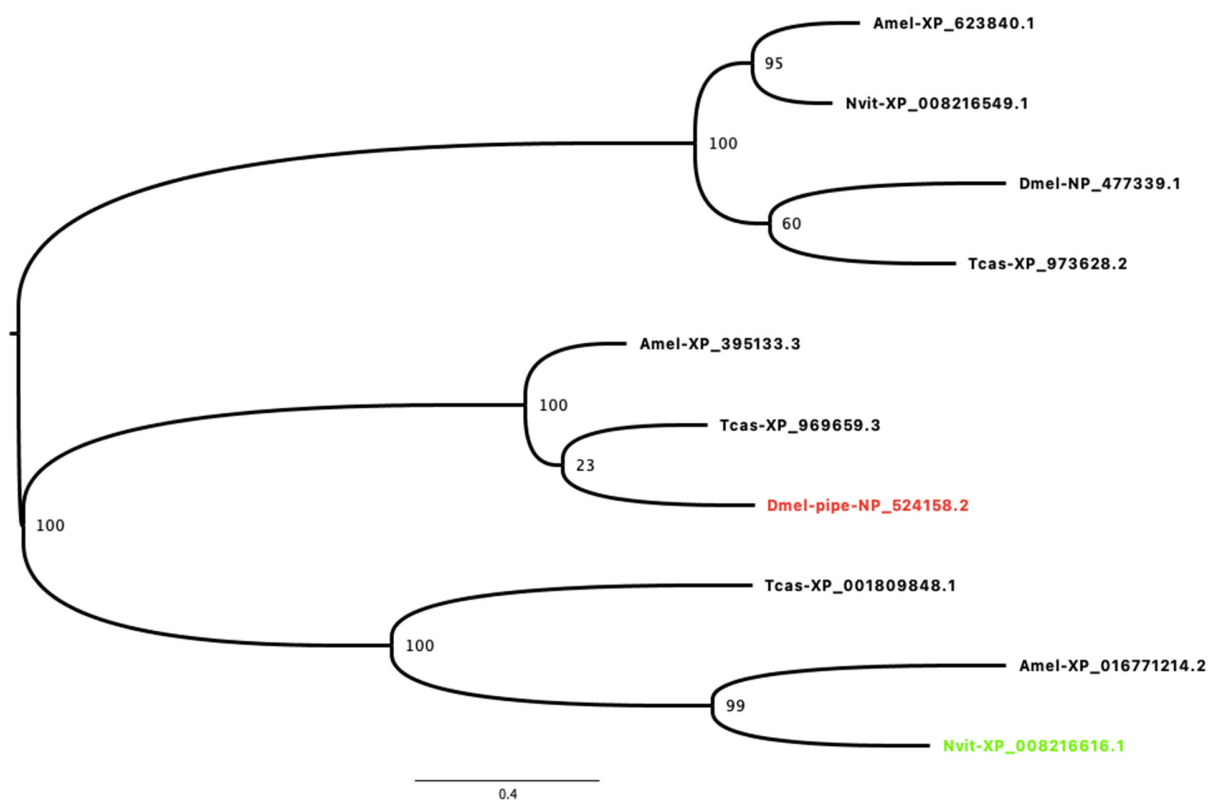

Supplementary Figure S1. Phylogenetic analysis of Pipe. Likely *Nasonia* ortholog of *D. melanogaster* Pipe (red) in green. Node labels are bootstrap support.

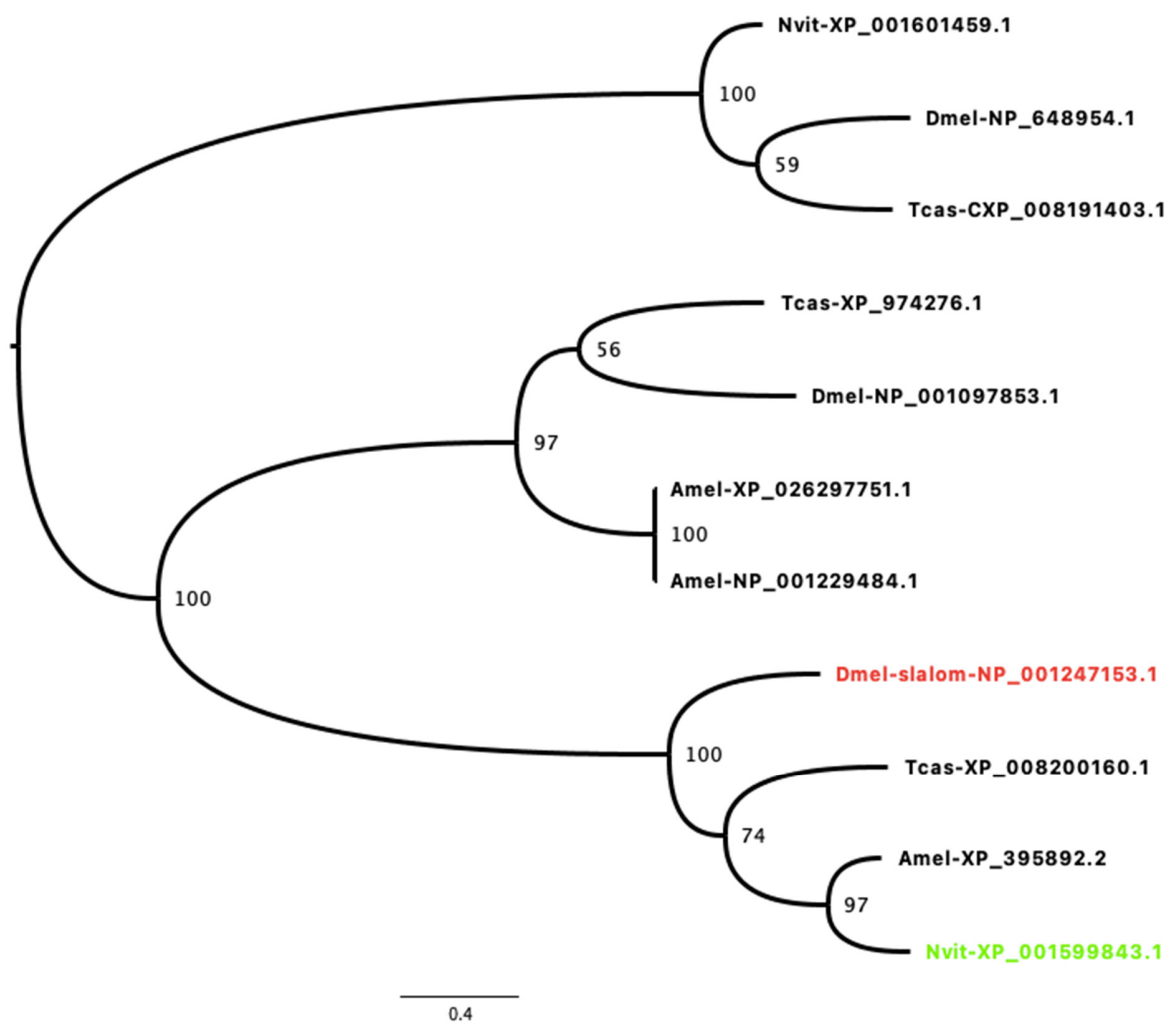

Supplementary Figure S2. Phylogenetic analysis of Slalom. Likely *Nasonia* ortholog of *D. melanogaster* Slalom (red) in green. Node labels are bootstrap support.

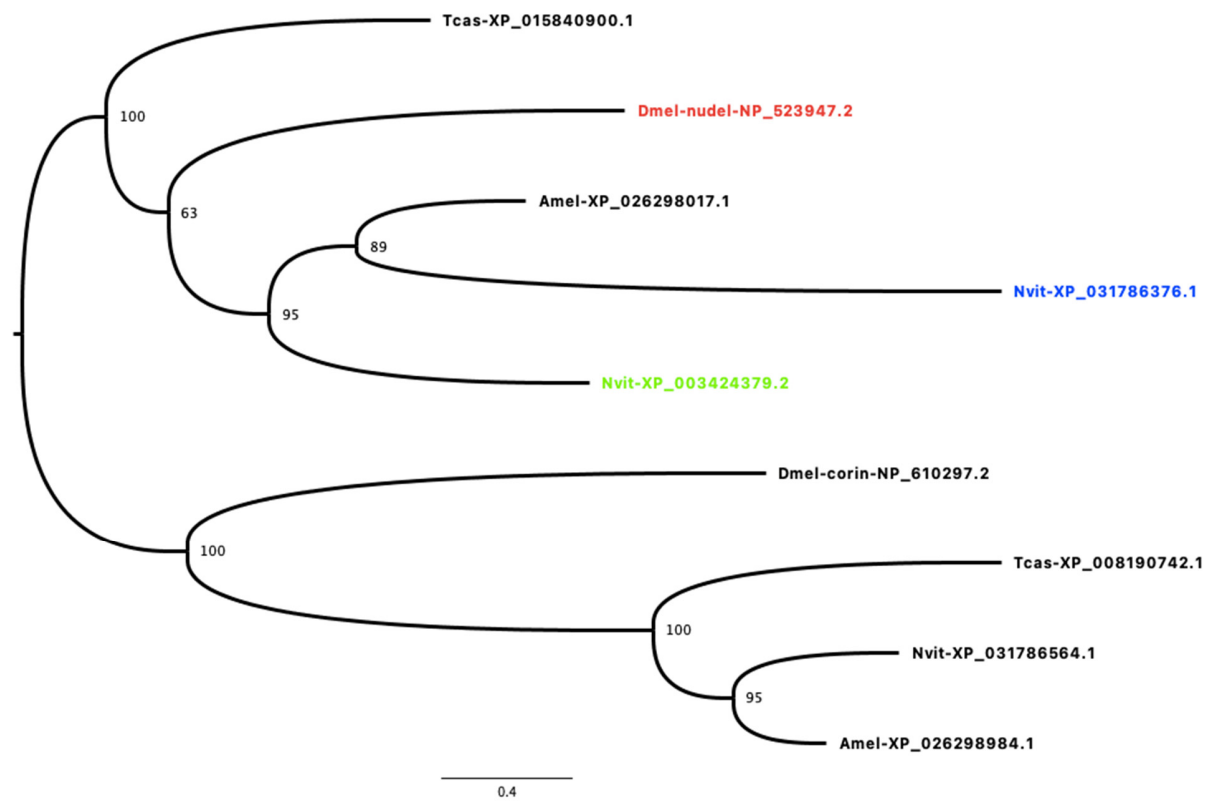

Supplementary Figure S3. Phylogenetic analysis of Nudel relatives. Likely Nasonia ortholog of *D. melanogaster* Nudel (red) examined in text in green. Potential new Nudel ortholog in blue. Node labels are bootstrap support.

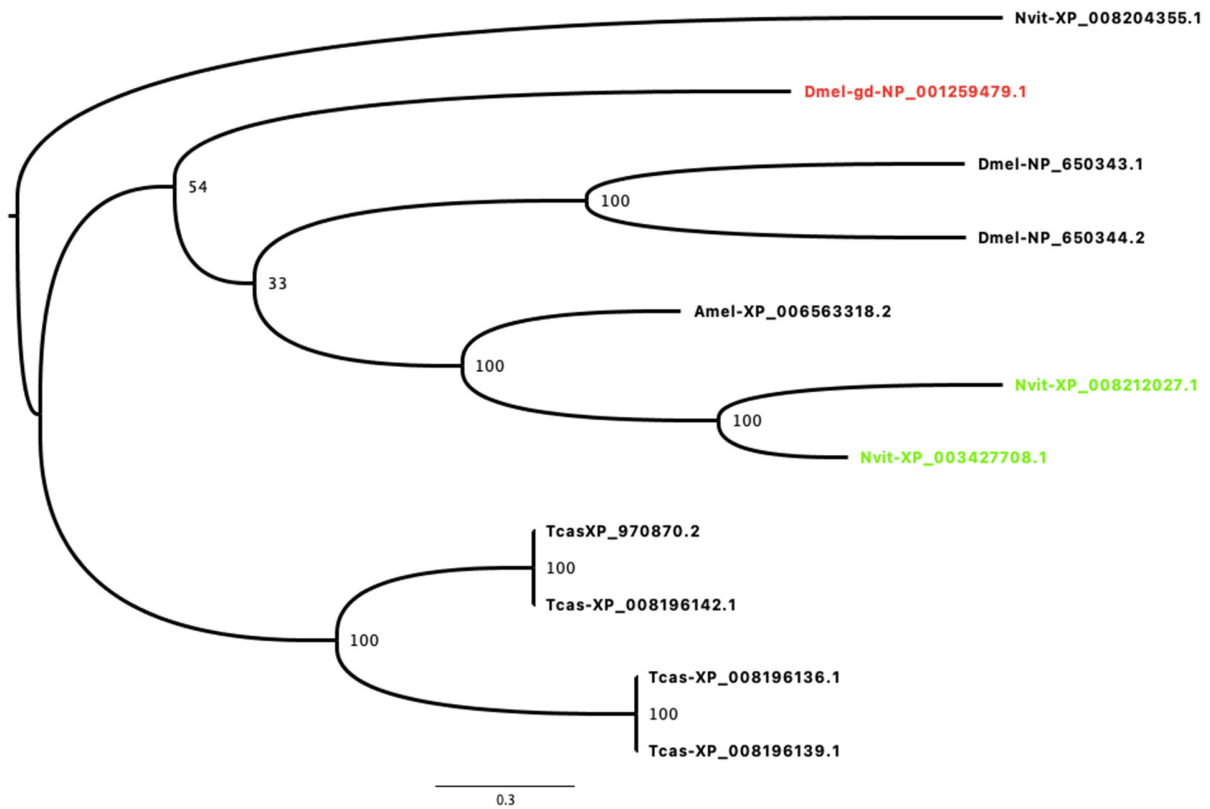

Supplementary Figure S4. Phylogenetic analysis of Gastrulation Defective (Gd). Likely *Nasonia* orthologs of *D. melanogaster* Gd (red) in green. Node labels are bootstrap support.

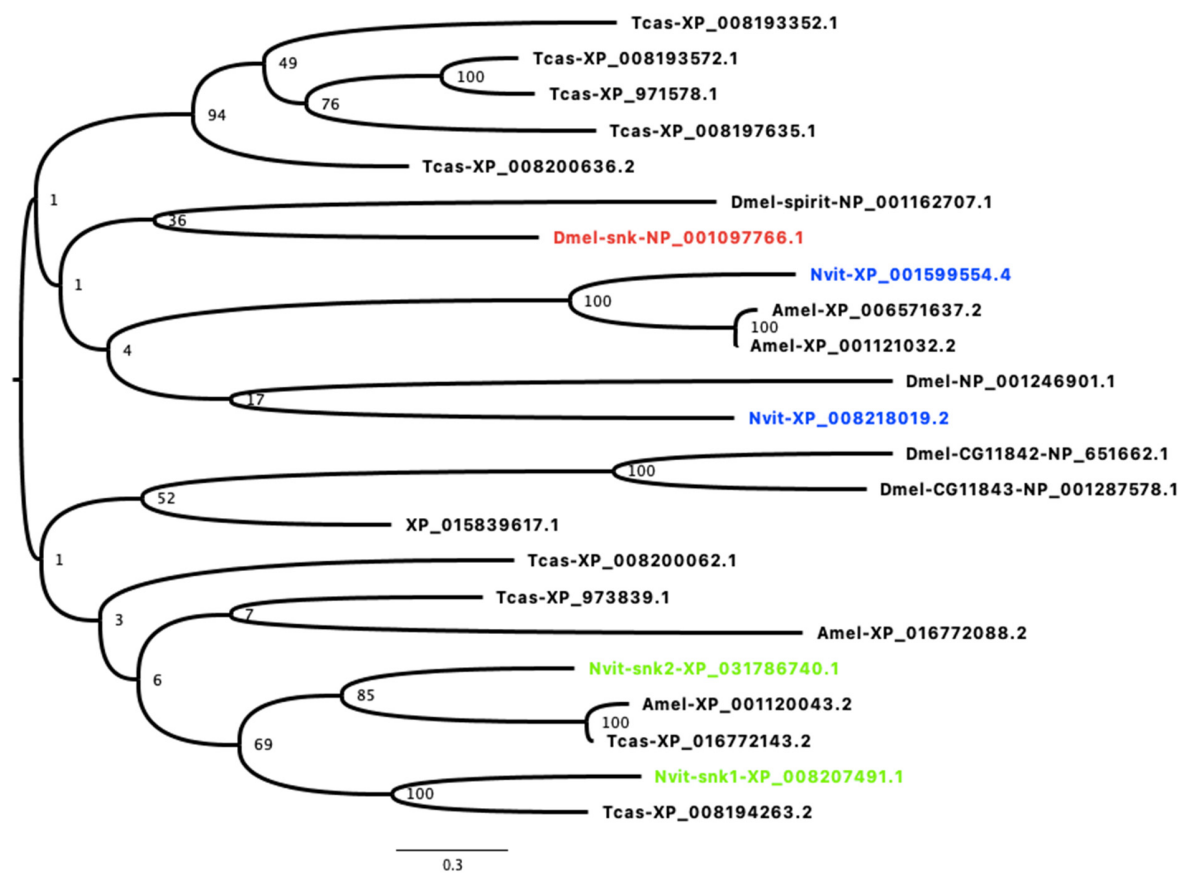

Supplementary Figure S5. Phylogenetic analysis of Snake (Snk). Potential *Nasonia* orthologs of *D. melanogaster* Snk (red) examined in the text in green. Potential additional orthologs in blue. Node labels are bootstrap support.

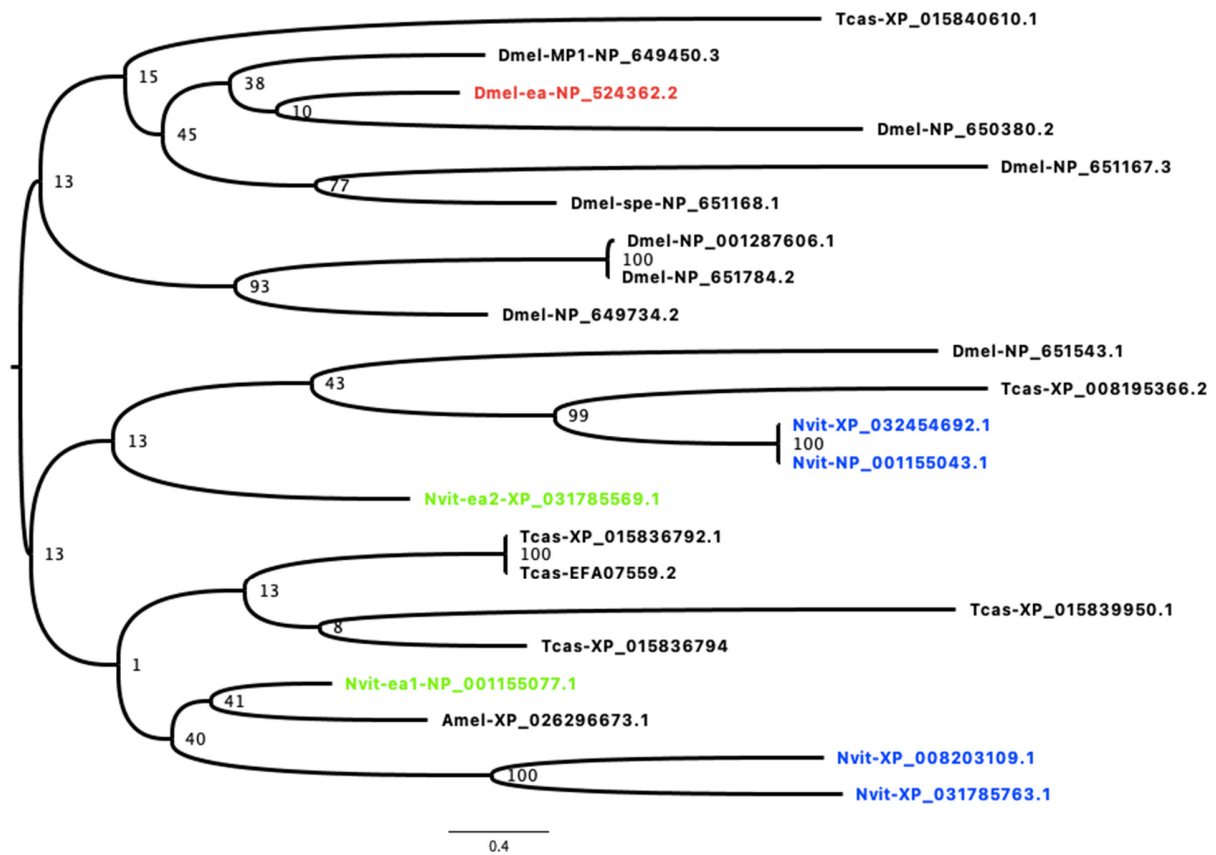

Supplementary Figure S6. Phylogenetic analysis of Easter (Ea). Potential *Nasonia* orthologs of *D. melanogaster* Ea (red) examined in the text in green. Potential additional orthologs in blue. Node labels are bootstrap support.

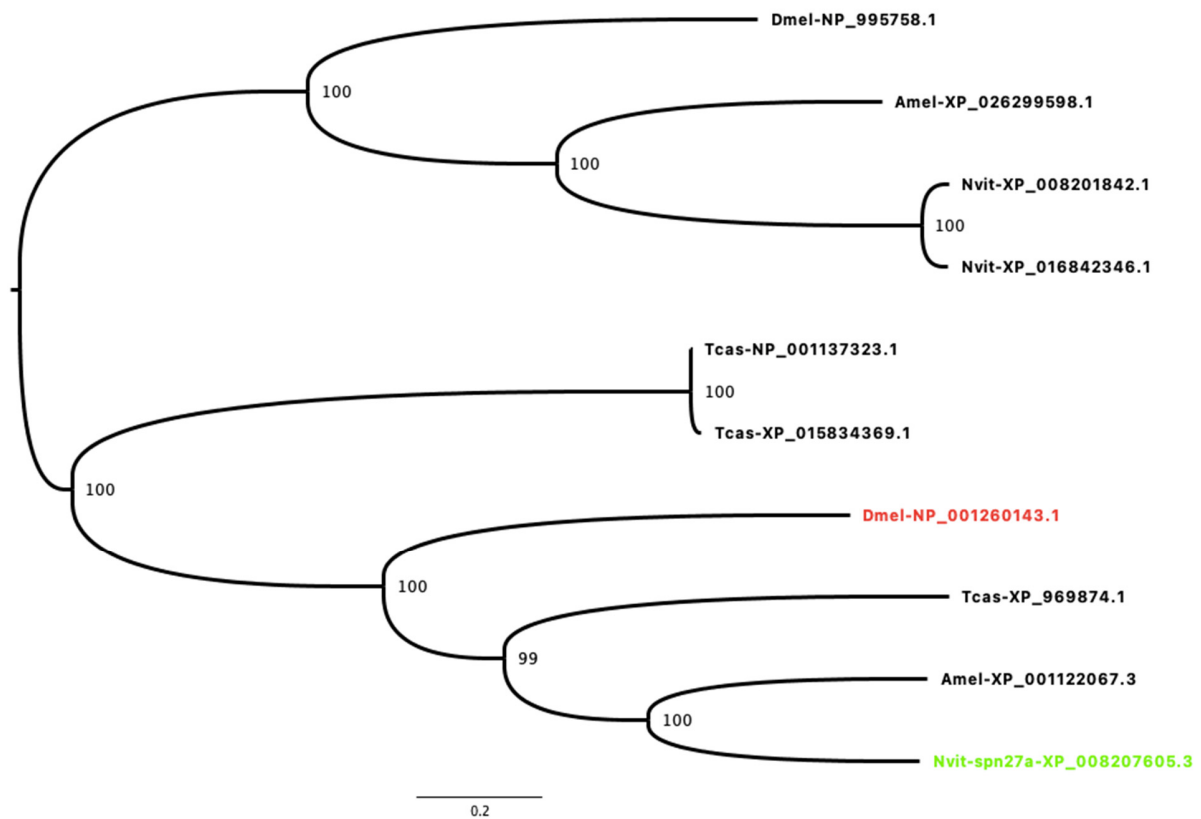

Supplementary Figure S7. Phylogenetic analysis of Serpin 27a (Spn 27a). Potential *Nasonia* orthologs of *D. melanogaster* Snake (red) examined in the text in green. Potential additional orthologs in blue. Node labels are bootstrap support.

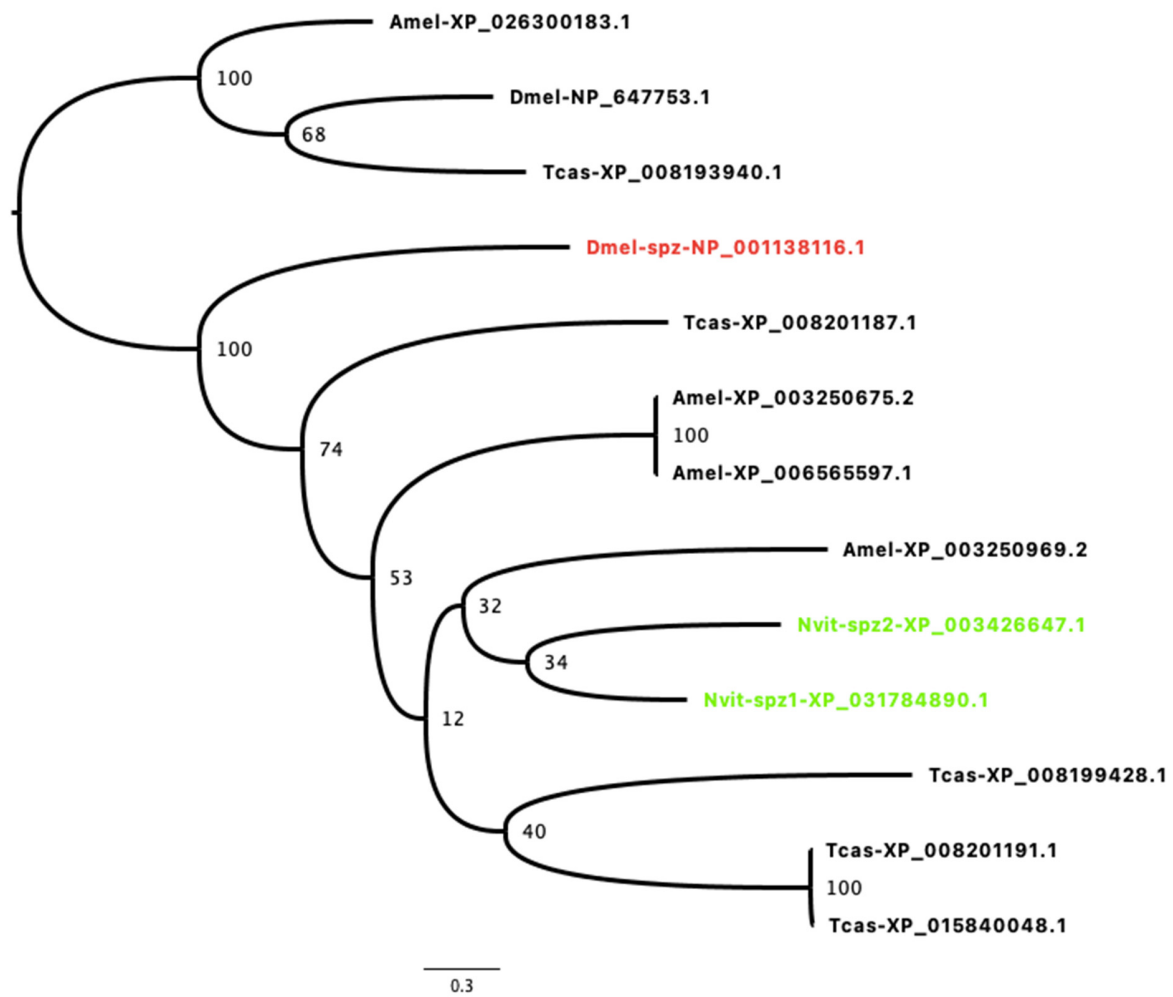

Supplementary Figure S8. Phylogenetic analysis of Spaetzle (Spz). Potential *Nasonia* orthologs of *D. melanogaster* Spz (red) examined in the text in green. Node labels are bootstrap support.



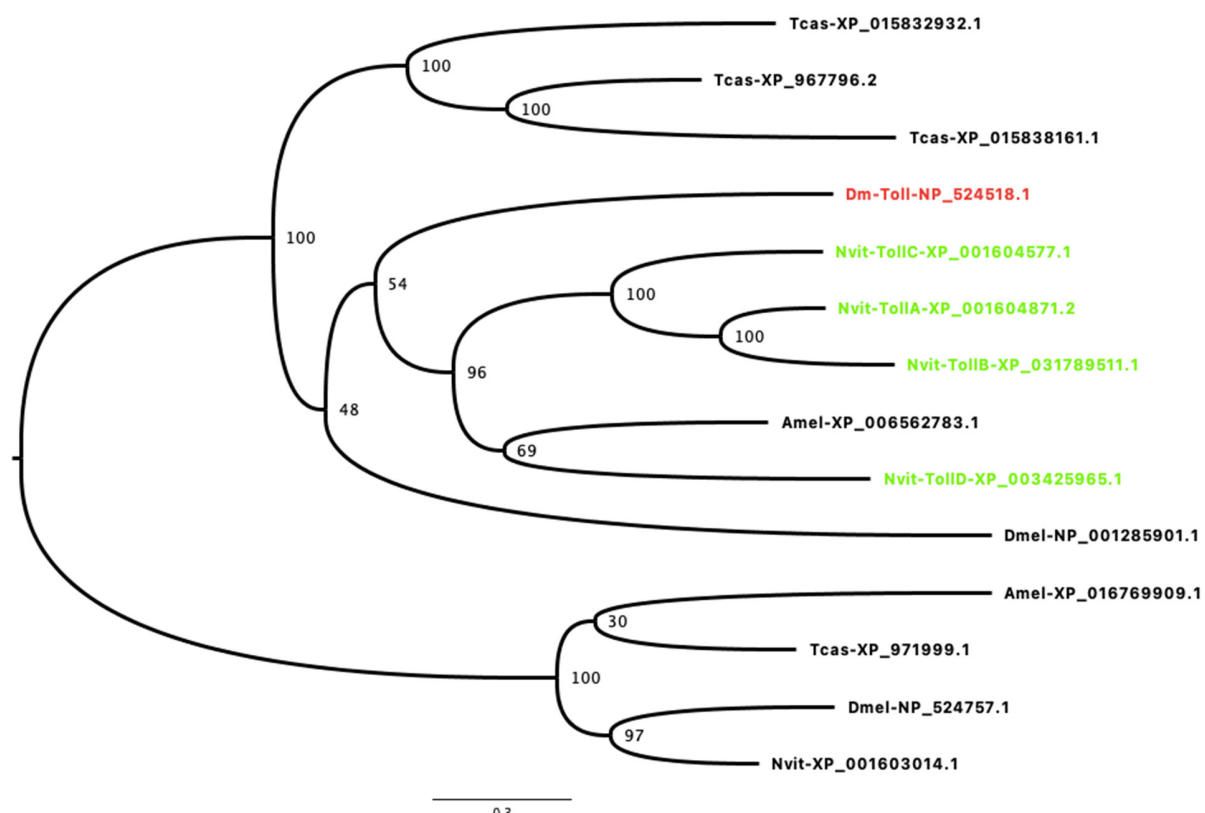

Supplementary Figure S9. Phylogenetic analysis of Toll. Potential *Nasonia* orthologs of *D. melanogaster* Toll (red) examined in the text in green. Node labels are bootstrap support.

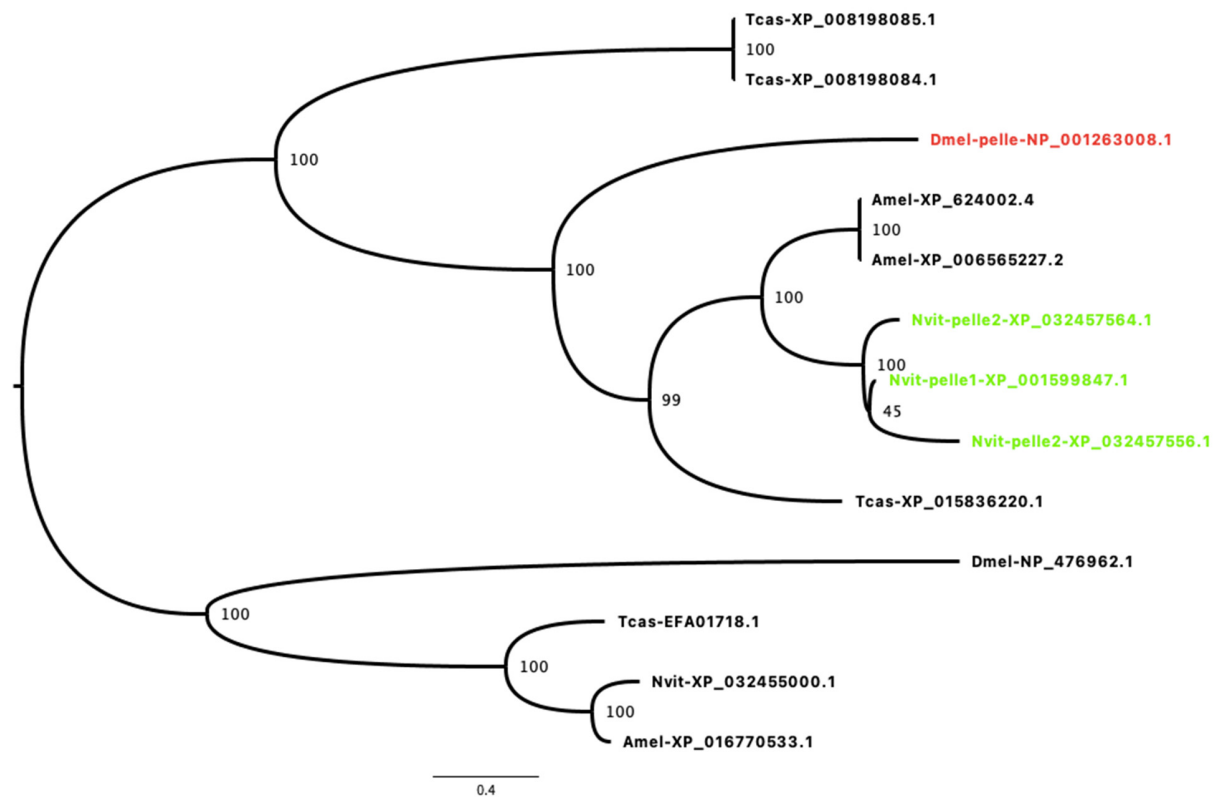

Supplementary Figure S10. Phylogenetic analysis of Pelle. Potential *Nasonia* orthologs of *D. melanogaster* Pelle (red) examined in the text in green. The most recent annotation split *Nv-pelle2* between two protein predictions. Node labels are bootstrap support.

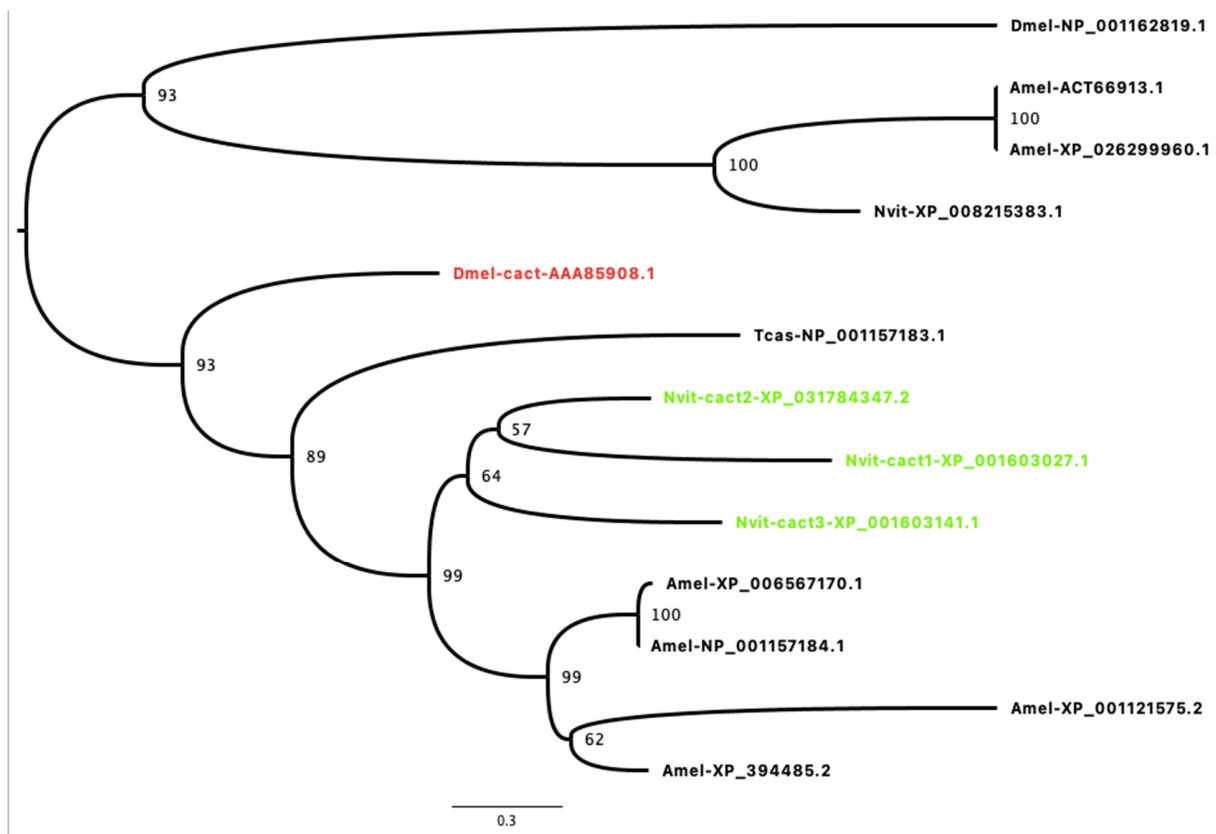

Supplementary Figure S11. Phylogenetic analysis of Cactus (cact). Potential *Nasonia* orthologs of *D. melanogaster* Cactus (red) examined in the text in green. Node labels are bootstrap support.

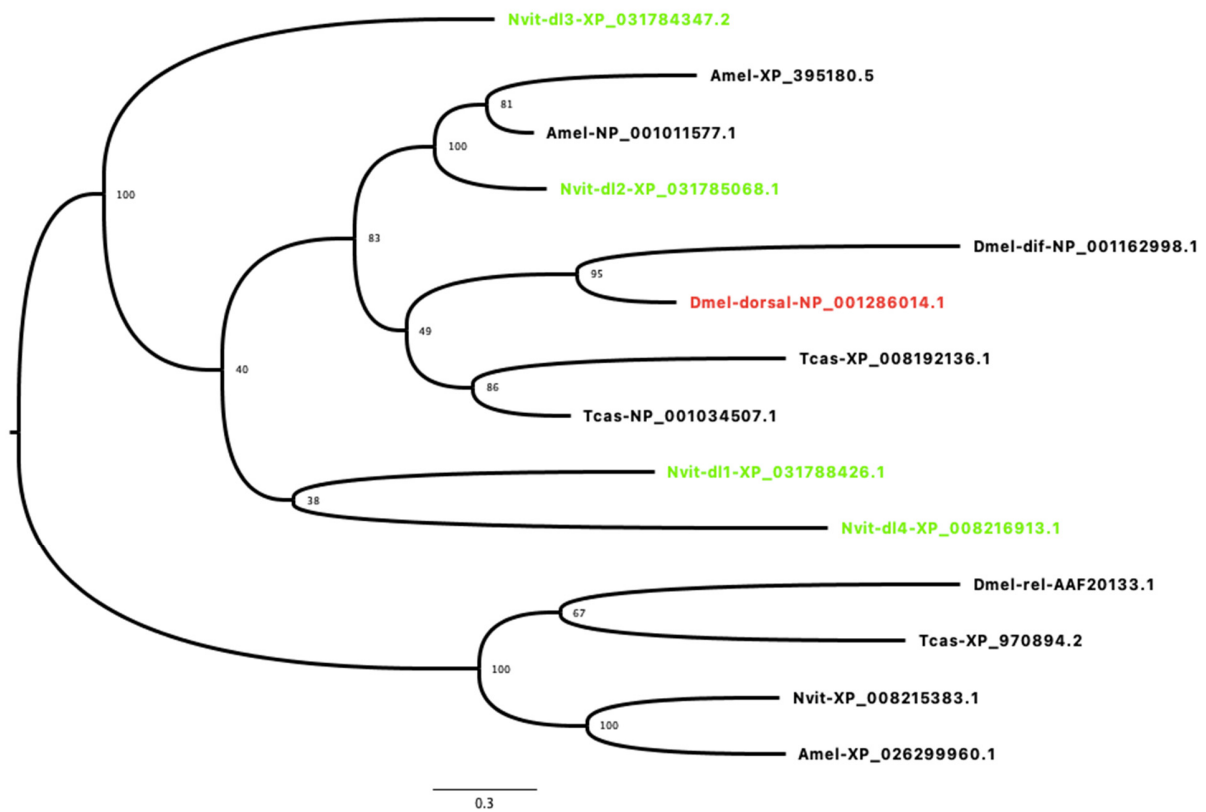

Supplementary Figure S12. Phylogenetic analysis of Dorsal (dl). Potential *Nasonia* orthologs of *D. melanogaster* Dl (red) examined in the text in green. Node labels are bootstrap support.
