# Supplementary material for: Expression and Function of Toll Pathway Components in the Early Development of the Wasp Nasonia vitripennis
Source: J Dev Biol. 2022 Jan 26;10(1):7. doi: 10.3390/jdb10010007 (PMC8883978; doi:10.3390/jdb10010007)
Supplement: Supplementary file 1 [file jdb-10-00007-s001.zip › Supplemental File S1-primers.xlsx]

## Sheet: Sheet1
gene	accession (cds coordinates)	Forward Primer (5'--3')	F primer position	Reverse Primer (5'--3')	R primer position
windbeutel	XM_008215157 (634..1392)	ACATAGGTGGGAGTCGATGC	569	GTGCGTGAAAGACTGCAAAA	1371
slalom	XM_001599793.4(235..1578)	TGCTTTGTGGGTACC	631	TACAACTGACCCGTGGTTGA	1461
pipe	XM_008218394.2(706..1656)	AAACCGTTGCCGTCTCTCTA	669	TGAGCAACGAGAATCGTGTC	1491
nudel	XM_003424331.3(50..2449)	ACAGATAGGCACGGACAACC	517	CAGTGCAAGCCTCTTTAGCC	1237
gd1	XM_003427660.3:549-1967	AAAATACGTTGGGCGCATAG	755	GTGCCCGAGGATATTGAGGA	1585
gd2	XM_008213805.2:728-2404	GTGAACGATTGCTCCGTGTT	1475	GTTATCGCGTGGACCTTCAC	2258
snake1	XM_008209269.2:105-1094	CGTCCAAACGAATCTGGTCT	266	TCTCGATCCAGTCGACGTAA	1069
snake2	XM_008219797(355..1446)	CCTGAGGTGTAAGAAGCCGA	648	TTCCAAAACTCGTAACGGCG	1344
easter1	NM_001161605(161-1315)	AGGCCTGCTTGTCTACCAGA	292	AGGCCTGCTTGTCTACCAGA	1052
easter2	XM_001600099.4:212-2926	ATATTCATTTTGCCGCTTGC	264	CTGGCCTTCTTCTCGATTTG	1096
serpin-27a	XM_008209383.4:103-2433	CACAGCATCTCGTCCTTCAA	1651	ATCAGCGGAATCACCGATAC	2453
spatzle1	XM_008213311.2:472-1269	AGCTGATCATACCCGTCCAA	536	GCCACCAACTGCCTGTAGAT	1107
spatzle2	XM_003426599.3:274-1026	CACAGTGGCCAACCTAACCT	462	ACTCTTCTTCCGCGTCATGT	1025
TollA	XM_001604821.4:241-3327	GAACTCGCCAAACTGGTCTC	447	AACGGATTGTTCGTCAGCTC	690
TollB	XM_031933651.2(1001..4138)	CGACAAATCCAATGTCATGC	2614	TTGTTGCGAAGCGTTAGTTG	3240
TollC	XM_001604527.4:364-3516	TGCGCTTCAACAACATATCC	1900	TTGCTCGAGTTGGAGAGCTT	2548
TollD	XM_003425917.3:182-3307	ATTGTCCGGTCAAAACGAAC	2064	GCTTCGAGTACAGCCAAACC	2744
pelle	XM_001599797.4:505-1947	GCTGCAACTGACAACTGGAA	682	CGGTTGACATTTGTGGTCTG	1504
pelle2	XM_008213384.2(30-713)	AGGTGCACAAAACTTCAACCA	410	AACCTTCCCGTGCTAATCCA	1218
tube	XM_031932276.1 (159-1076)	AATTCCATCGCCTGACAATC	263	TCAGTCTGTTTCGCCCTTCT	1076
myd88	XM_008208672.3(704..1957)	TCGTGCAGACCAAATCTCAG	921	TTGGGCTCTTGAAGTGGAGT	1659
cact1	XM_001602977.5(793..1836)	ACTTGGATATGGGCAAGTCG	986	CTACTGTCGCTGCTGCTGTC	1790
cact2	XM_031928487.2(654..4736)	CCTGAACCTGCTAAGGCTTG	3768	ATGAGCTCCTTGGCTAGTCG	4569
cact3	XM_001603091.6(513..1619)	CCTACAGCTCCGAATTGTCTTC	628	ACTCCTGGATCAGACAGAGGAA	1452
dorsal1	XM_031932568.1(238..1647)	GGAAAGCTCGCTAGAGGTGA	291	GTGCTGTCATTTGCTCGAAA	1330
dorsal2	XM_031929212.2(426..2060)	AAACATGACCGTTTCCTTCG	746	TGAGGCATTTGTTTCAGCAG	1447
dorsal3	XM_031928487.2(654..4736)	TTCTTGCGTCACAAAAGACG	833	AACATTTTGCTCGGGTATGC	1595
dorsal4	XM_008218692.3(322..1878)	CAACAGTTGCTGGTGGATTG	929	TGTCGGTTGGATTTGAAACA	1645
bcl3	XM_016987638.3(996..3494)	TGATCTGCGAGCAAAAGCTC	2429	GTGAACGATTGCTCCGTGTT	3168
These primers were used to generate templates for in situ hybridization probes and dsRNA. Gene specific portions of the primers shown. Each Forward primer had the sequence 5'-GGCCGCGG-3' appended to the 5' end, and the sequence 5'-CCCGGGGC-3' was appended to the 5' endo of the Reverse primers. Forward and reverse Universal primers recognizing the 8 base sequences and including the T7 RNA polymera…
Universal Primers
F-Universal	GAGAATTCTAATACGACTCACTATAGGGCCGCGG
R-Universal	AGGGATCCTAATACGACTCACTATAGGGCCCGGGGC
qPCR primers
gene	Forward	F location	Reverse	R location
dorsal1	GGTGAGAAAGTCGTTAGGAGTG	306	GGGCGTCAGAGGTACATTAAA	450
dorsal2	CGTTGTCTCGGAACCTATC	968	GTCCTCTTTGGCGACTTT	1100
dorsal3	CGCACAATCTCATAGGGAA	871	GAAAGGGTCCACTCGTAAG	1040
dorsal4	CATTCTGTGCGAGAGAGTA	957	GGCTAAGGGTATCGGTTT	1114
rp49	GTGTACAGGCCGAAAATCGT	94	GCTTCCTCCAGTTACGCTTG	187
